# Supplementary material for: Suppression of iASPP-dependent aggressiveness in cervical cancer through reversal of methylation silencing of microRNA-124
Source: PubMed Central journal article supplement (PMC5073231; doi:10.1038/srep35480), 2016-10-21
Supplement: srep35480-s1.pdf [file srep35480-s1.pdf]

## Supplemental Information

### Suppression of iASPP-dependent aggressiveness in cervical cancer through reversal of methylation silencing of microRNA-124

Peixin Dong<sup>1,\*</sup>, Ying Xiong<sup>2,\*</sup>, Hidemichi Watari<sup>3</sup>, Sharon JB Hanley<sup>1</sup>, Yosuke Konno<sup>3</sup>, Kei Ihira<sup>3</sup>, Fumihiko Suzuki<sup>4</sup>, Takahiro Yamada<sup>1</sup>, Masataka Kudo<sup>3</sup>, Junming Yue<sup>5</sup> & Noriaki Sakuragi<sup>1,3</sup>

<sup>1</sup>Department of Women's Health Educational System, Hokkaido University School of Medicine, Hokkaido University, N15, W7, Sapporo 0608638, Japan

<sup>2</sup>Department of Gynecology, State Key Laboratory of Oncology in South China, Sun Yat-sen University Cancer Center, Guangzhou 510060, P. R. China

<sup>3</sup>Department of Gynecology, Hokkaido University School of Medicine, Hokkaido University, N15, W7, Sapporo 0608638, Japan

<sup>4</sup>Department of Obstetrics and Gynecology, Tohoku University, Sendai 9808574, Japan

<sup>5</sup>Department of Pathology and Laboratory Medicine, University of Tennessee Health Science Center, USA; Center for Cancer Research, University of Tennessee Health Science Center, Memphis, TN, USA

\*Equal contributors

Correspondence should be addressed to: P. D. (email: dpx1cn@gmail.com), H. W. (email: watarih@med.hokudai.ac.jp) and J. Y. (email: jyue@uthsc.edu)

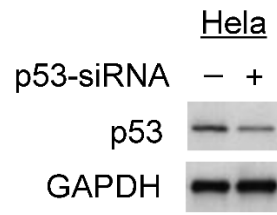

**Supplementary Figure 1: Immunoblot of p53 protein expression in Hela cells after knockdown of p53.**

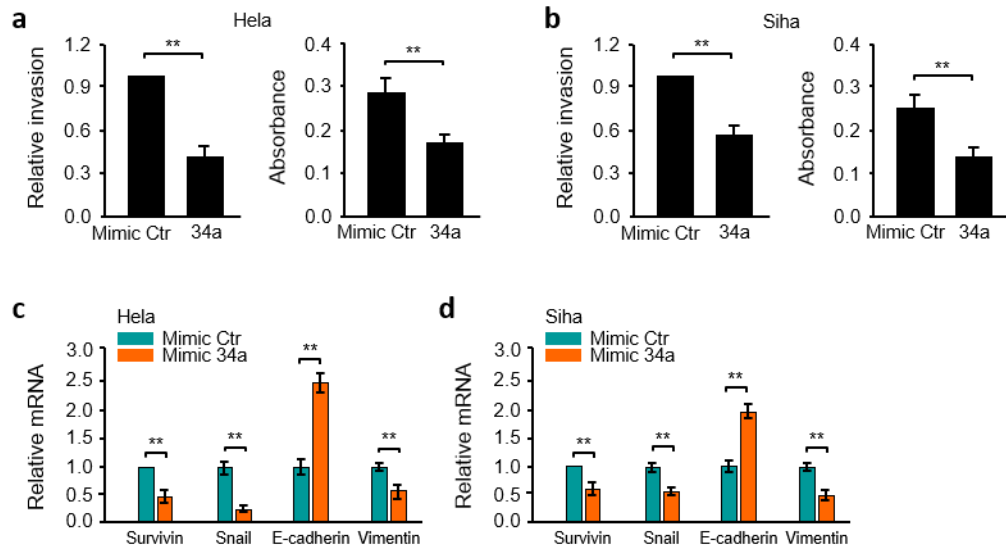

**Supplementary Figure 2: miR-34a functions as a tumor suppressor in CC cells.** Invasion (left) and proliferation (right) of HeLa (**a**) and SiHa (**b**) cells transfected with control or miR-34a mimic. qPCR analysis of the indicated mRNAs in HeLa (**c**) and SiHa (**d**) cells transfected with control or miR-34a mimic. The data are shown as the mean  $\pm$  SEM;  $n = 3$ ;  $**P < 0.01$ .
